# Supplementary material for: Mass spectrometric investigation of the roles of several chemical intermediates in diamond synthesis
Source: Royal Society of Chemistry journal article supplement (doi:10.1039/c4ra09058f), 2014-12-11
Supplement: c4ra09058f1.pdf [file c4ra09058f1.pdf]

Supporting information

## **Mass Spectrometric Investigation on the Roles of Several Chemical Intermediates in Diamond Synthesis**

L. S. Fan,<sup>a</sup> Y. S. Zhou,<sup>a</sup> M. X. Wang,<sup>a</sup> Y. Gao,<sup>a</sup> W. Xiong,<sup>a</sup> Y. Liu,<sup>a</sup> Y. Lu,<sup>a</sup> J. F. Silvain<sup>b</sup> and Y. F. Lu<sup>a</sup>,

<sup>a</sup> Department of Electrical Engineering, University of Nebraska-Lincoln, Lincoln, Nebraska, 68588-0511, USA.

<sup>b</sup> Institute de Chimie de la Matière Condensée de Bordeaux, Université de Bordeaux, 33608 Pessac cedex, France.

Corresponding author: Prof. Yongfeng Lu  
Department of Electrical Engineering, University of Nebraska-Lincoln,  
Lincoln, NE 68588-0511 (US)  
E-mail: ylu2@unl.edu. Tel: (402) 472-8323, Fax: (402) 472-4732.

## Experimental details of diamond film growth

The experimental setup for diamond deposition using the CO<sub>2</sub> laser-assisted combustion flames is similar to the previous report.<sup>S1</sup> Combustion flames were produced by a gas mixture of C<sub>2</sub>H<sub>4</sub>, C<sub>2</sub>H<sub>2</sub>, and O<sub>2</sub> with a gas ratio of 1:1:2. A wavelength-tunable CO<sub>2</sub> laser (PRC Inc, 9.2 ~ 10.9 μm) was used to irradiate the C<sub>2</sub>H<sub>4</sub>/C<sub>2</sub>H<sub>2</sub>/O<sub>2</sub> combustion flames. The laser beam was normally projected through the flame and parallel to a tungsten carbide (WC) substrate, with a focused diameter of ~ 2 mm. The laser incident power was tuned to keep the absorbed power to be 20 W. A WC substrate (BS-6S, Basic Carbide Corp.) was placed on a water-cooled brass plate. The temperature of the substrate during the diamond deposition was maintained at 770 ~ 780 °C and monitored by a noncontact pyrometer (OS3752, Omega Engineering, Inc.). The deposition time was fixed at 1 hour.

## Raman spectra of diamond films deposited as a function of the distance $h$

The bonding structures in the diamond films deposited at different  $h$  values were characterized using Raman spectroscopy as shown in Fig. S1. The Raman peak centred at 1337 cm<sup>-1</sup> is a typical diamond peak. The band located at 1370 cm<sup>-1</sup> (D-band) is attributed to the breathing modes of  $sp^2$  atoms in rings, reflecting disordered carbon in the films. The broadband centred at 1550 cm<sup>-1</sup> (G-band) is attributed to the bond stretching of all pairs of  $sp^2$  atoms in both rings and chains and indicates graphite-like carbon contents in diamond matrix.<sup>S2</sup> In the sample deposited at an  $h$  value of 3.0 mm, a typical nano-diamond Raman feature is observed. As increasing  $h$  from 3.1 to 3.5, the diamond peak intensity increases and the G-band is suppressed, which indicates an improved diamond quality.

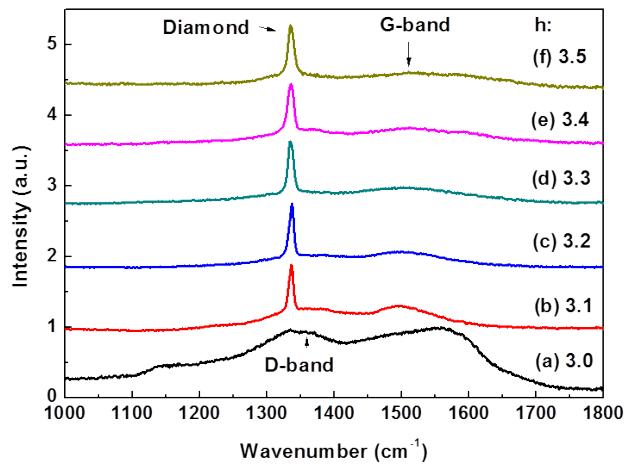

**Figure S1.** Raman spectra of diamond films deposited as a function of the distance  $h$  from substrates to the torch nozzle.

## Raman spectra of diamond films deposited as a function of the gas composition $R$

The bonding structures in the diamond films deposited as a function of the gas composition  $R$  were characterized using Raman spectroscopy as shown in Fig. S2. The diamond obtained at an  $R$  value of 0.922 shows a typical nano-diamond feature. The diamond peak intensity increases with an increasing  $R$  value, suggesting an improved diamond quality.

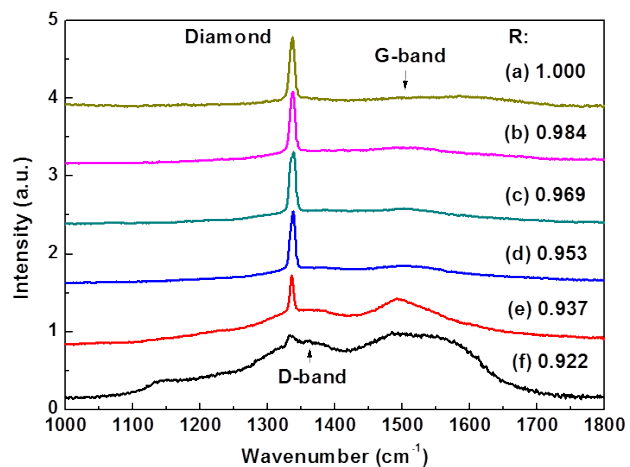

**Figure S2.** Raman spectra of diamond films deposited as a function of the gas composition  $R$ .

### Notes and references

- 1 Z. Q. Xie, Y. S. Zhou, X. N. He, Y. Gao, J. Park, H. Ling, L. Jiang and Y. F. Lu, *Cryst. Growth Des.* 2010, **10**, 1762.
- 2 A. C. Ferrari and J. Robertson, *Phil. Trans. R. Soc. Lond. A*, 2004, **362**, 2477.
